# Supplementary material for: PPDPF alleviates hepatic steatosis through inhibition of mTOR signaling
Source: PubMed Central journal article supplement (PMC8144412; doi:10.1038/s41467-021-23285-8), 2021-05-24
Supplement: 41467_2021_23285_MOESM3_ESM.pdf [file 41467_2021_23285_MOESM3_ESM.pdf]

## Description of Additional Supplementary Files

**File Name:** Supplementary Data 1

**Description:** The statistical analysis for Fig.2e.

**File Name:** Supplementary Data 2

**Description:** The statistical analysis for Fig.8f and Fig.8g.

**File Name:** Supplementary Data 3

**Description:** The statistical analysis for Supplementary Fig.4c.

**File Name:** Supplementary Data 4

**Description:** The statistical analysis for Supplementary Fig.7c and Supplementary Fig.7f
